# Supplementary material for: Biomimetic control of charge transfer in MOFs by solvent coordination for boosting photocatalysis
Source: Royal Society of Chemistry journal article supplement (doi:10.1039/d2cc03333j), 2022-01-01
Supplement: d2cc03333j1.pdf [file d2cc03333j1.pdf]

*Supporting Information for*

**Biomimetic Control of Charge Transfer in MOFs by Solvent Coordination  
for Boosting Photocatalysis**

*Zejin Wang<sup>a, d</sup>, Rui Ding<sup>b</sup>, Jie Zhang<sup>a, d</sup>, Linrong Chen<sup>a</sup>, Ying Wang<sup>\*a, d</sup>, Jianguo Liu<sup>c</sup> and  
Zhigang Zou<sup>b, d</sup>*

<sup>a</sup>School of Chemistry and Chemical Engineering, Nanjing University, Nanjing 210033, P.R. China.

<sup>b</sup>College of Engineering and Applied Sciences, Nanjing University, Nanjing 210033, P.R. China.

<sup>c</sup>School of Energy& Power and Mechanical Engineering, North China Electric Power University, Beijing 102208, P.R. China.

<sup>d</sup>Eco-materials and Renewable Energy Research Center (ERERC), National Laboratory of Solid State Microstructures, Kunshan Innovation Institute of Nanjing University, Jiangsu Key Laboratory for Nanotechnology, Nanjing, 210093, P. R. China.

## 1. Experimental Section

### 1.1 Materials:

All chemicals were used without further purification. Perylene-3,4,9,10-tetracarboxylic dianhydride (98%, Shanghai Aladdin Biochemical Technology Co., Ltd), Nickel(II) acetate tetrahydrate (AR, Sinopharm Chemical Reagent Co., Ltd), Sodium hydroxide (AR, Sinopharm Chemical Reagent Co., Ltd). Acetonitrile, Methanol, N,N-Dimethylformamide, Dimethyl sulfoxide, Ethanol (AR, all solvents are from Sinopharm Chemical Reagent Co., Ltd).

### 1.2 Preparation of Na-PTCA

First, PTCDA needs to be deprotonated by NaOH. PTCDA (1.256 g) and NaOH (0.512 g) are dispersed in deionized water (200 mL). After it is completely hydrolyzed to form a transparent solution (stirring at 70°C, at least 3h), fluorescent-green Na-PTCA aqueous solution is obtained<sup>1</sup>.

### 1.3 Synthesis of $[Ni(PTCA) \cdot sol]-MOF$

Nickel acetate (0.199 g) is dissolved in deionized water (25 mL). The obtained nickel acetate solution and Na-PTCA aqueous solution (25 mL) are fully mixed under vigorous stirring. Then, the mixed solution is transferred to a polytetrafluoroethylene lined reactor. The reactor is reacted at 120 °C for 24 h. After natural cooling to room temperature and washing with deionized water and ethanol, the final product (Actual yield= 96.8%) is dried in a vacuum oven at 70 °C for 10 h.  $[Ni(PTCA) \cdot sol]-MOFs$  are synthesized by changing the dissolved solvent of  $Ni(CH_3COO)_2$ .

## 2. Characterization

### 2.1 Instrument parameters

**XRD:** Powder X-ray diffraction (PXRD) measurement was tested by Bruker D8 ADVANCE with an operating voltage 40 kV and operating current of 40 mA (Cu K $\alpha$  radiation,  $\lambda=1.54056$  Å).

**FT-IR:** Fourier transform infrared (FT-IR) spectra was measured by Nicolet NEXUS870 spectrometer using KBr pellets supporter at room temperature.

**PL:** Photoluminescence emission spectra was obtained on Shimadzu RF-5301PC fluorometer spectrometer in the aqueous solution and the excitation wavelength was 380 nm.

**XPS:** X-ray photoelectron spectroscopy (XPS) measurement was performed on PHI 5000 Versa Probe X-ray photoelectron spectrometer (a monochromatic Al K $\alpha$  X-ray radiation).

**LRS:** Raman spectra was taken on Renishanplc H33148 Laser Confocal Raman spectrometer.

**BET:** The Brunauer-Emmett-Teller (BET) surface area experiment was measured on Micromeritics ASAP-2020 adsorption analyzer under N<sub>2</sub>-physisorption at 77 K. In order to study the effect of solvent, the pretreatment temperature is kept at 90 °C.

**ICP-OES:** Inductively coupled plasma-optical emission spectrometry (ICP-OES) measurement was carried out on Avio500 spectrometer.

**TGA:** Thermogravimetric analysis (TGA) experiment was measured by NETZSCH STA 449C under N<sub>2</sub> atmosphere with heating rate of 20 °C/min .

**EPR:** Electron paramagnetic resonance (EPR) measurement was carried out on Bruker BioSpin EMX PLUS (PPMS). In-situ EPR test is realized by taking a small amount of photocatalytic system solution and testing under light conditions.

**UV-Vis:** UV-vis spectra was collected by Shimadzu UV-3600 spectrometer.

**UV-vis DRS :**UV-vis diffused reflectance spectroscopy (DRS) was acquired through Shimadzu UV-3600 spectrometer with BaSO<sub>4</sub> as reflectance.

**TRF:** Time-resolved fluorescence (TRF) decay spectra was obtained by Edinburgh FLS920.

**SEM:** Scanning electron microscope (SEM) was measured by Hitachi S-4800 FESEM system.

## ***2.2 Electrochemical measurements***

The photo-electrochemical measurement was tested with a standard three-electrode system by using Chenhua CHI 660D electrochemical analyzer<sup>2</sup>. It consisted of ITO glass coated by samples as working electrode, the saturated calomel reference electrode (SCE) (saturated KCl) and Pt counter electrode. The 300 W xenon lamp was used as light source and 0.2 M Na<sub>2</sub>SO<sub>4</sub> aqueous solution as electrolyte. To prepare the working electrode, 5 mg sample and 10 μL 0.25% Nafion were dispersed in 1 ml isopropanol. At last, the obtained dispersion solution was coated on FTO glass surface and dried under infrared lamp. The electrochemical impedance spectra (EIS) were measured at the open circuit voltage in 0.1 M ascorbic acid aqueous solution.

## ***2.3 Photocatalytic water oxidation reaction***

The photocatalytic reactions were carried out in a quartz reactor (300 mL) and tested in Automatic on-line Photocatalytic analysis system (300 W, xenon lamp, Simulated sunlight). The specific steps were taken as follows: photocatalyst (30 mg) with 100 μL H<sub>2</sub>PtCl<sub>6</sub> solution (1mg/100 mL) was added into 100 mL ascorbic acid aqueous solution (0.1 mol/L). Before the visible light irradiation, the system was bubbled with argon and evacuation several times. The amount of H<sub>2</sub> evolved was analyzed by gas chromatography (GC-14C, Shimadzu, TCD, Ar as the carrier).

### 3 Methods and Models

The first principle simulations were performed using the Vienna ab initio simulation package (VASP)<sup>3</sup>. The generalized gradient approximation (GGA) was chosen to describe the exchange–correlation interaction with the revised Perdew–Burke–Ernzerhof (PBE) functional<sup>4</sup>. The energy cutoff was set to 400 eV.  $2 \times 2 \times 2$  was chosen to be the gamma k-point mesh. The slab for DFT simulation contains 4 Ni atoms, 16 O atoms, 18 H atoms, and 48 C atoms, namely [Ni(PTCA)·sol]-MOF. As for the geometry optimization, the corresponding threshold was set to  $2 \times 10^{-2}$  eV/Å. And for the self-consistent field (SCF) energy convergence, it was  $10^{-4}$  eV. As the descriptor of HER activity,  $\Delta G_H^*$  was defined as  $\Delta G_H^* = \Delta E_H^* + \Delta E_{ZPE} - T\Delta S_H$ .  $\Delta E_H^*$  is the hydrogen chemisorption energy expressed by the following equation:  $\Delta E_H^* = E_{(\text{Slab-H}^*)} - E_{(\text{Slab})} - \frac{1}{2}E_{\text{H}_2}$  [30].  $E_{(\text{Slab-H}^*)}$  and  $E_{(\text{Slab})}$  are the computed energies of the active sites with and without adsorbed  $\text{H}^*$ , respectively.  $\Delta E_{ZPE}$  is the zero-point energy difference between the adsorbed and gas phases.  $\Delta S_H$  is the entropy change between the adsorbed H and gas-phase  $\text{H}_2$  at 1 atm and T is 298.15 K. The thermal correction to Gibbs free energy is the sum of them and could be obtained via vibrational frequency calculations. VASPKIT was used [31] to directly read this value from OUTCAR file. As for computing the density of states, the SCF energy convergence is changed to  $10^{-5}$  eV along with the previously optimized geometric structure.

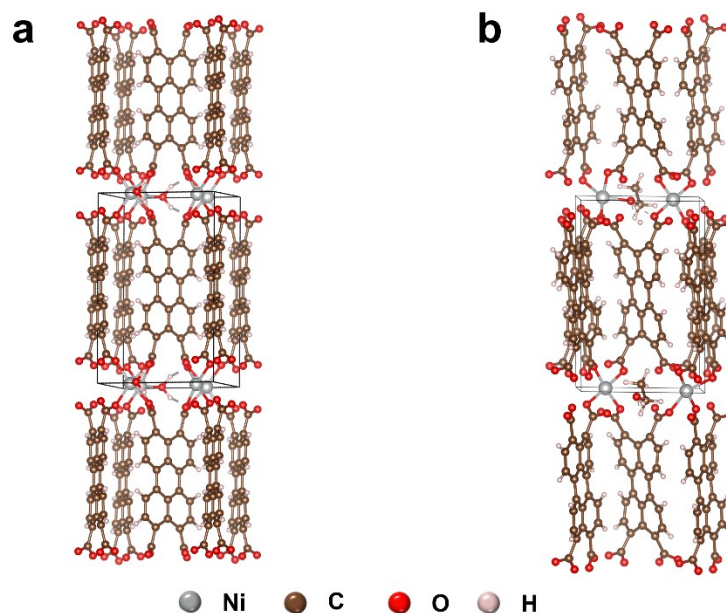

**Scheme 1.** Optimized structures of (a) [Ni(PTCA)·H<sub>2</sub>O]-MOF and (b) [Ni(PTCA)·EtOH]-MOF.

**Table S1.** Structural parameters. Atomic coordinates for [Ni(PTCA)·H<sub>2</sub>O]-MOF in the Pbam space group. ( $R_{wp}$  = 9.97 %,  $R_p$  = 11.0%)

| <b>Atom</b> | <b>Wyckoff</b> | <b>x/a</b> | <b>y/b</b> | <b>z/c</b> | <b>Occupancy</b> |
|-------------|----------------|------------|------------|------------|------------------|
| <b>Ni1</b>  | 4g             | 0.25648    | 0.11097    | 0.00000    | 0.500            |
| <b>O1</b>   | 8i             | 0.39603    | 0.19559    | 0.09193    | 1.000            |
| <b>O2</b>   | 8i             | 0.35013    | 0.51250    | 0.12019    | 1.000            |
| <b>O3</b>   | 4g             | 0.13947    | 0.35570    | 0.00000    | 0.500            |
| <b>C1</b>   | 8i             | 0.37729    | 0.33492    | 0.11859    | 1.000            |
| <b>C2</b>   | 8i             | 0.42185    | 0.34699    | 0.24089    | 1.000            |
| <b>C3</b>   | 8i             | 0.36581    | 0.19952    | 0.30222    | 1.000            |
| <b>C4</b>   | 8i             | 0.36470    | 0.20504    | 0.40380    | 1.000            |
| <b>C5</b>   | 8i             | 0.43949    | 0.32450    | 0.43887    | 1.000            |
| <b>C6</b>   | 4e             | 0.50000    | 0.50000    | 0.40642    | 0.500            |
| <b>C7</b>   | 4e             | 0.50000    | 0.50000    | 0.29310    | 0.500            |

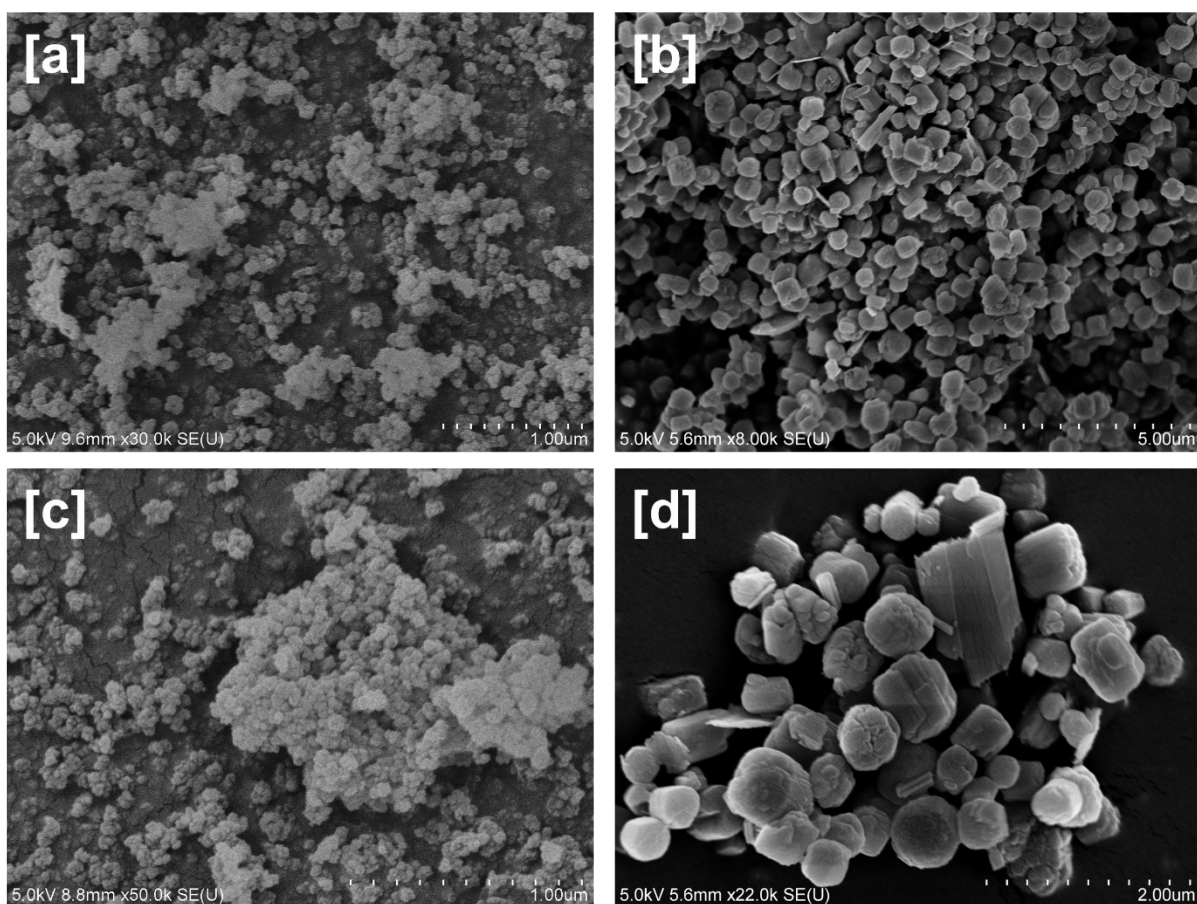

**Fig S1.** Comparison of [Ni(PTCA)·sol]-MOF: SEM of [Ni(PTCA)·EtOH]-MOF (a), [Ni(PTCA)·MeCN]-MOF (b), [Ni(PTCA)·DMF]-MOF (c) and [Ni(PTCA)·DMSO]-MOF (d).

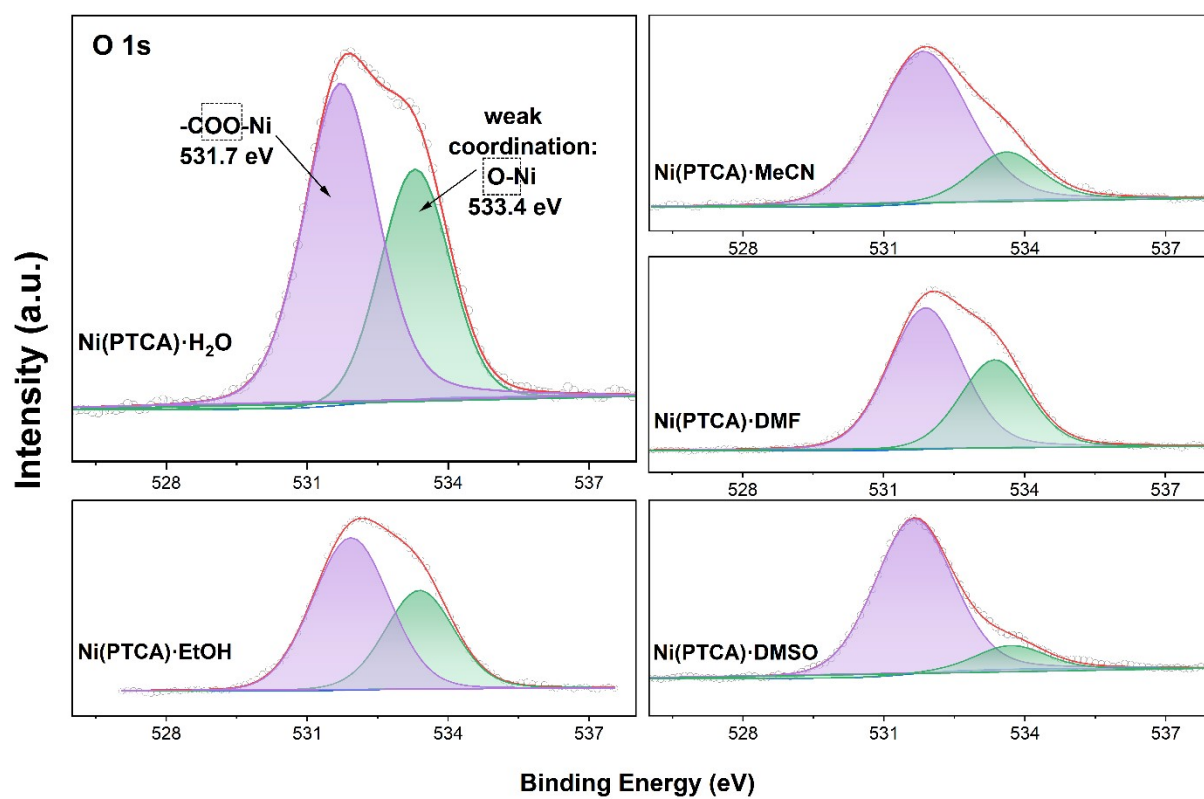

**Fig S2.** XPS O 1s of [Ni(PTCA)·sol]-MOF.

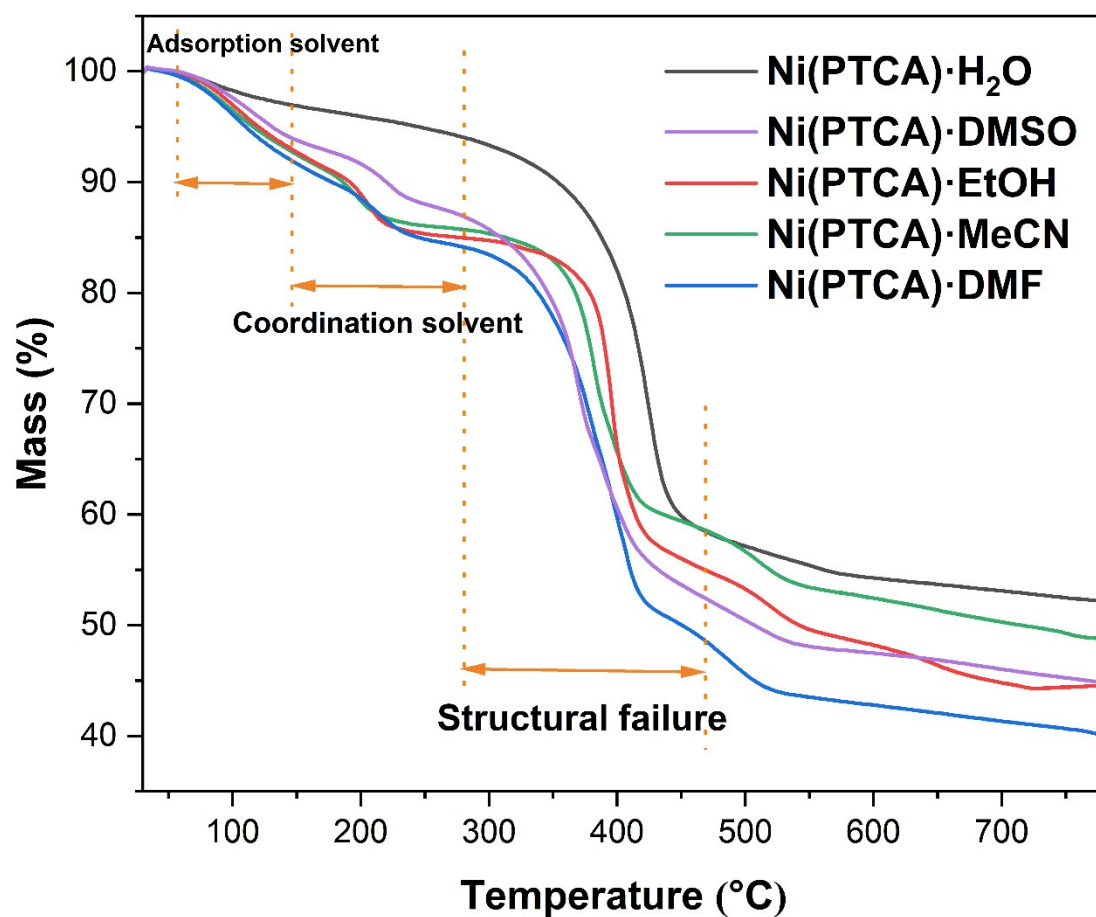

**Fig S3.** TGA curves of [Ni(PTCA)·sol]-MOF.

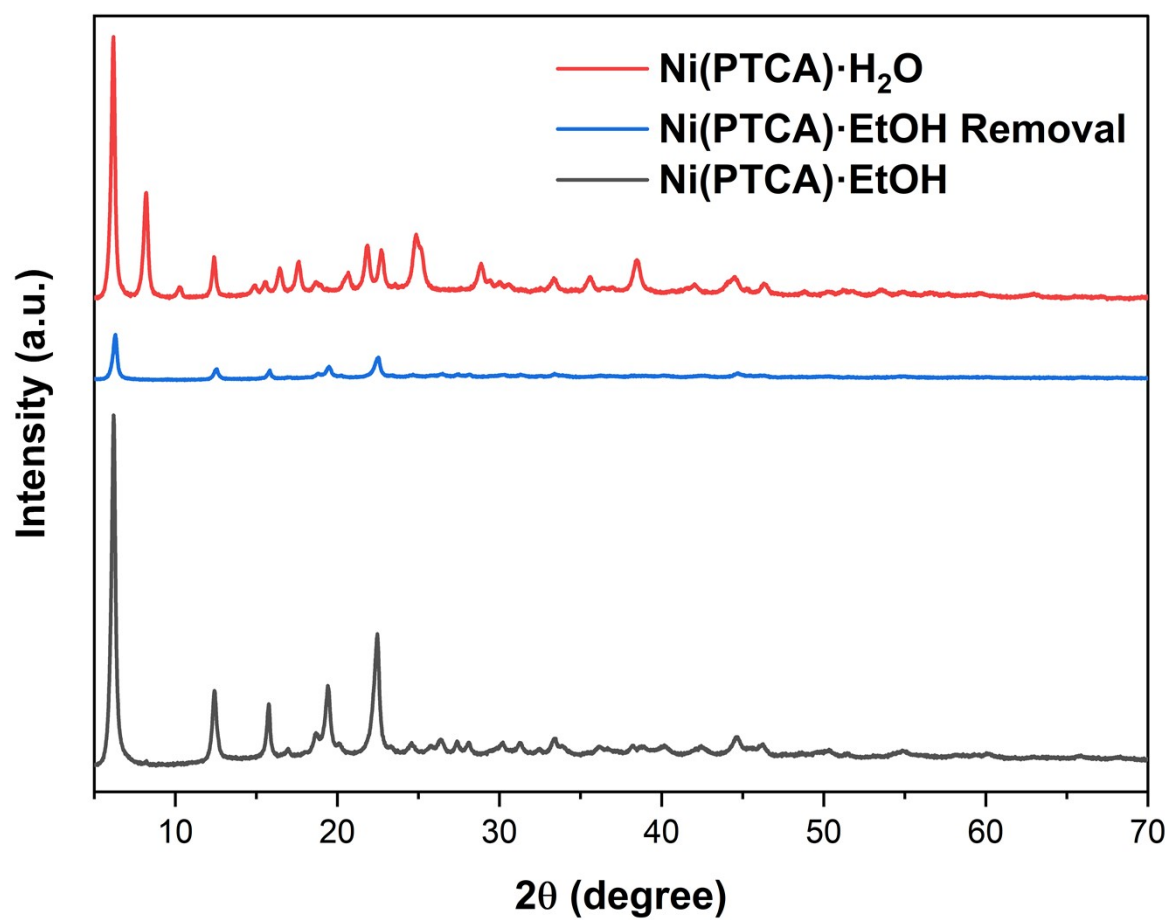

**Fig S4** XRD pattern of  $[\text{Ni(PTCA)·EtOH}]$ -MOFs after removal solvent at 180°C.

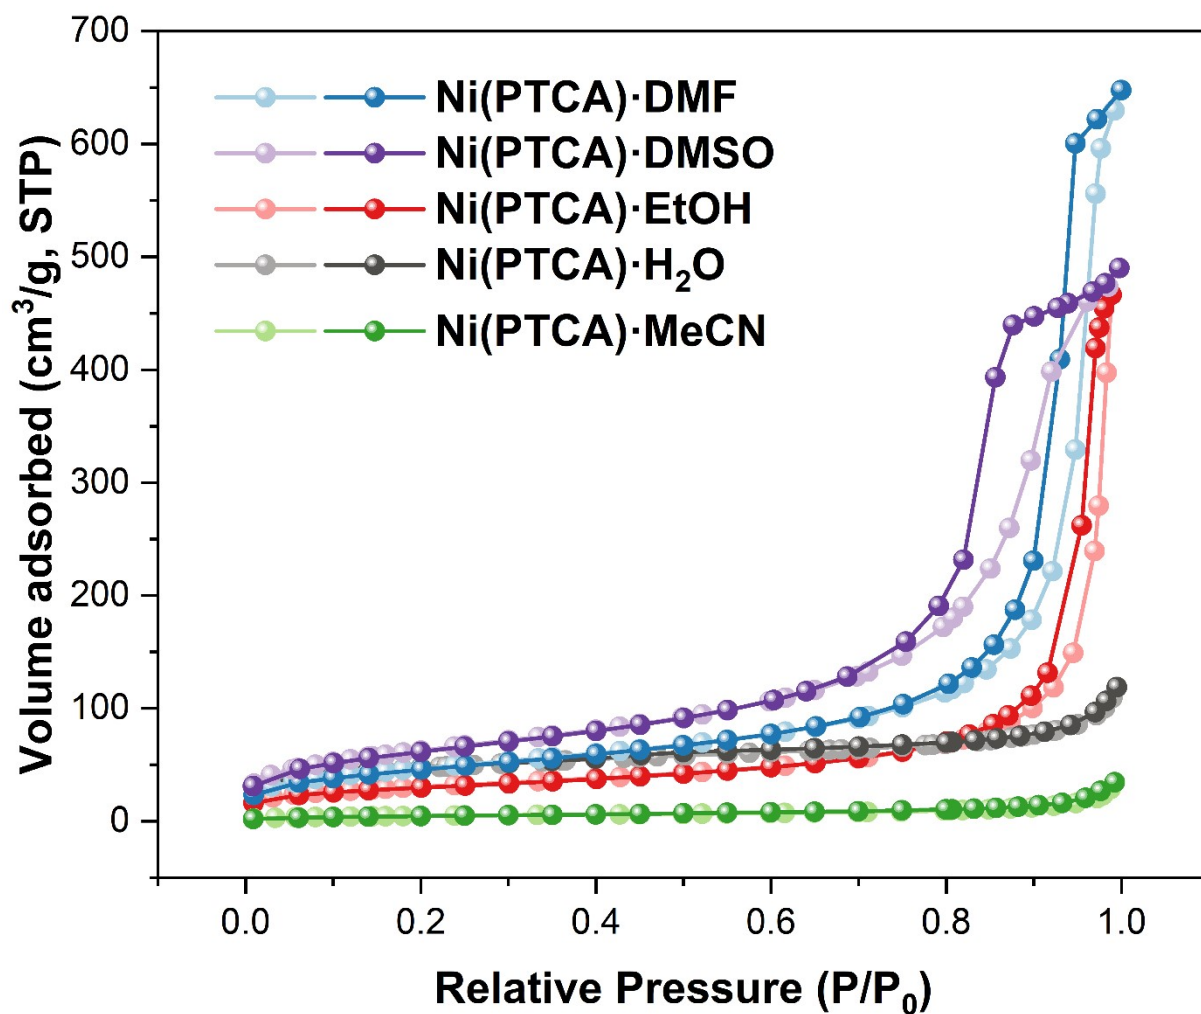

Fig S5. Nitrogen adsorption-desorption isotherm of [Ni(PTCA)·sol]-MOFs.

Table S2. Nitrogen adsorption-desorption isotherm results

| Sample                    | Surface Area (m <sup>2</sup> /g) <sup>a</sup> | Pore Volume (m <sup>3</sup> /g) <sup>b</sup> | Pore Size (Å) <sup>b</sup> |
|---------------------------|-----------------------------------------------|----------------------------------------------|----------------------------|
| Ni(PTCA)·H <sub>2</sub> O | 166.6995                                      | 0.183627                                     | 44.0619                    |
| Ni(PTCA)·EtOH             | 109.4062                                      | 0.721355                                     | 263.7345                   |
| Ni(PTCA)·DMF              | 170.8292                                      | 1.001524                                     | 234.5088                   |
| Ni(PTCA)·DMSO             | 228.5810                                      | 0.758011                                     | 132.6463                   |
| Ni(PTCA)·MeCN             | 17.2377                                       | 0.053474                                     | 124.0868                   |

<sup>a</sup> Obtained from BET method.

<sup>b</sup> Total pore volume taken from the N<sub>2</sub> adsorption volume at a relative pressure (P/P<sub>0</sub>) of 0.99

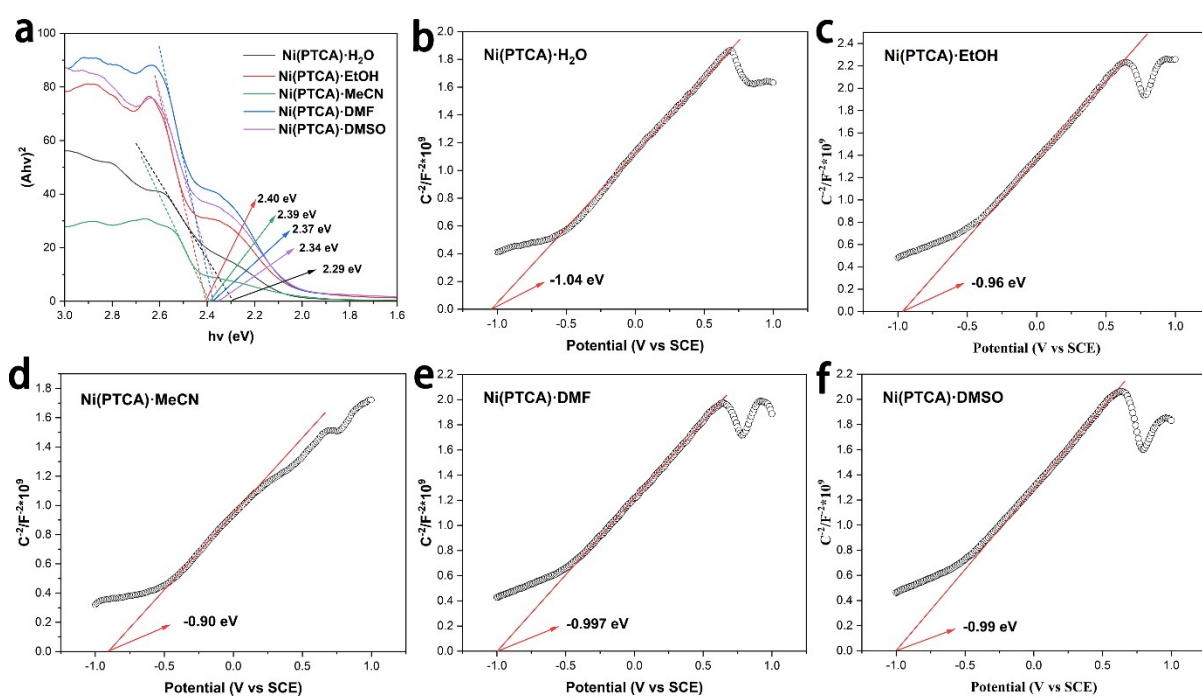

**Fig S6.** Bandgap and Mott Schottky plots of [Ni(PTCA)·sol]-MOFs.

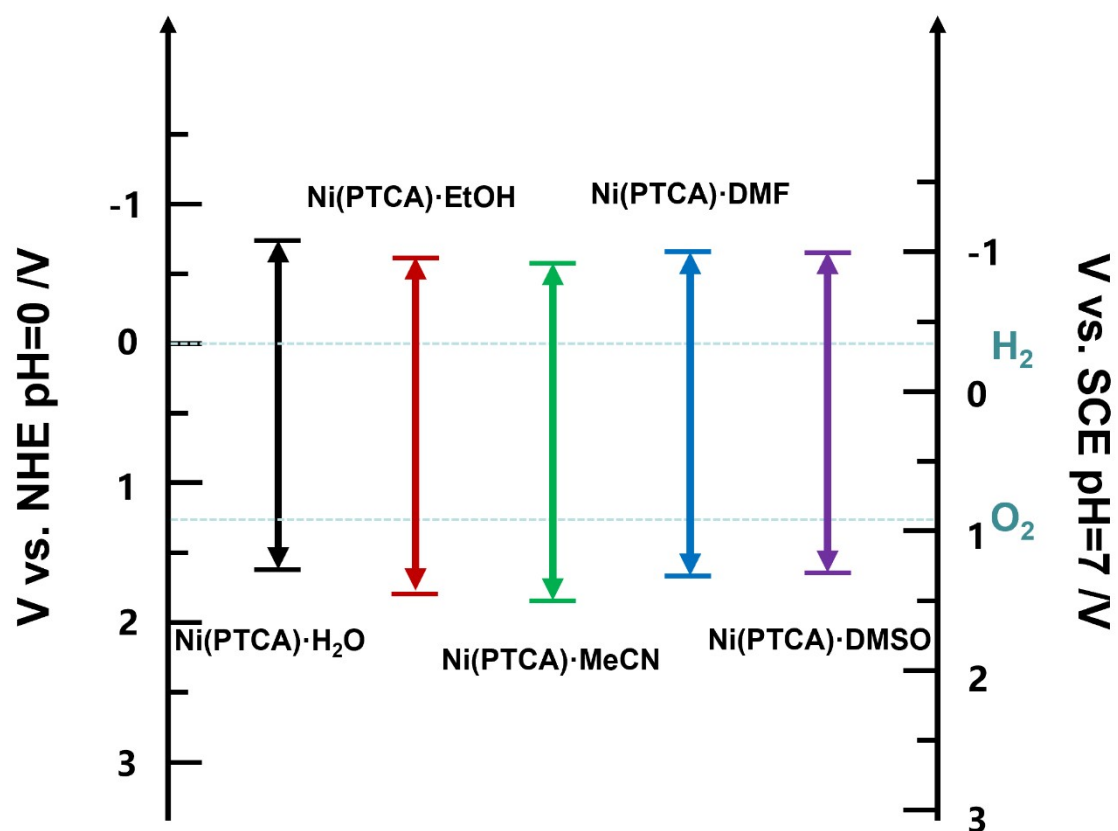

Fig S7. Energy band structure diagrammatic sketch of [Ni(PTCA)·sol]-MOFs.

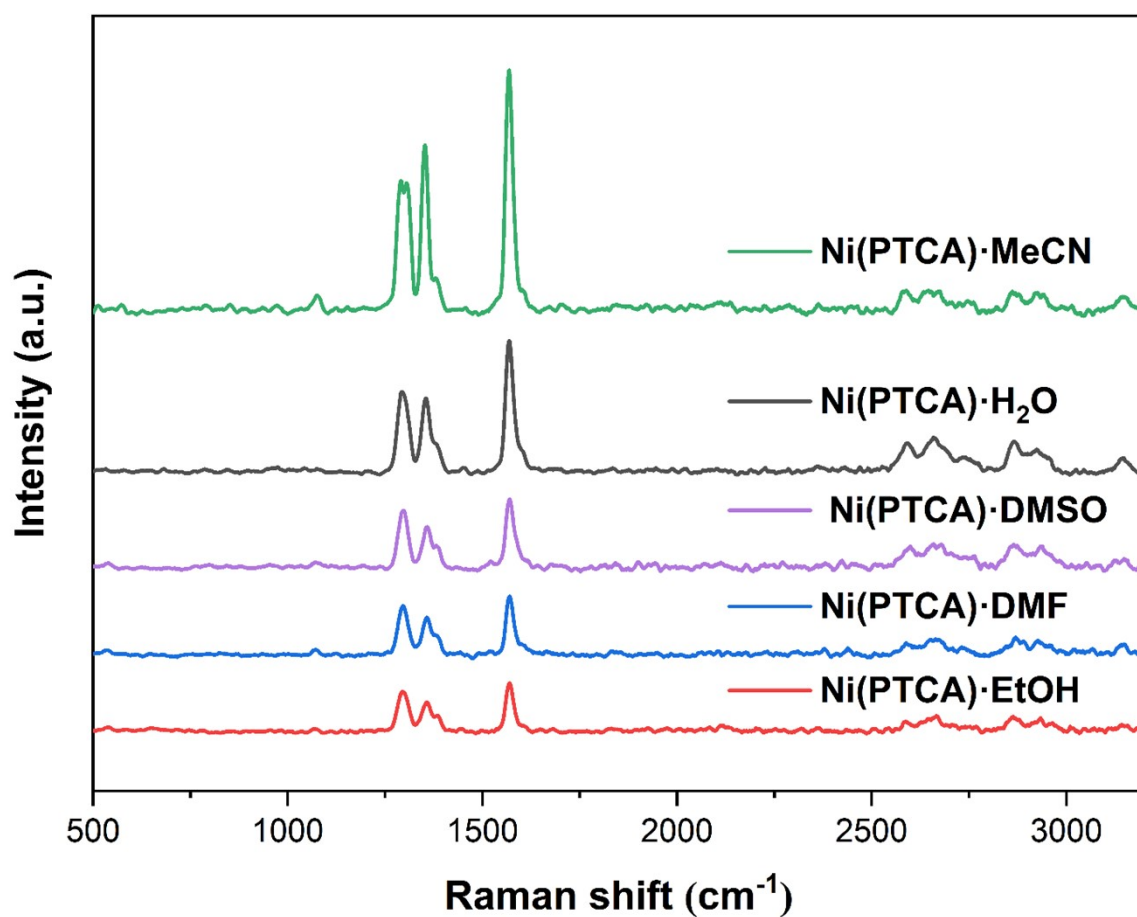

**Fig S8.** Raman spectrum of  $[\text{Ni(PTCA)·sol}]\text{-MOFs}$

**Table S3.** Kinetic analysis of emission decay

| <b>Sample</b>                  | <b><math>\tau_1</math> (ns)</b> | <b>Rel.%</b> | <b><math>\tau_2</math> (ns)</b> | <b>Rel.%</b> | <b><math>\chi^2</math></b> | <b><math>\langle\tau\rangle</math> (ns)</b> |
|--------------------------------|---------------------------------|--------------|---------------------------------|--------------|----------------------------|---------------------------------------------|
| <b>Ni(PTCA)·H<sub>2</sub>O</b> | 0.33                            | 12.94        | 4.66                            | 87.06        | 1.21                       | 3.088                                       |
| <b>Ni(PTCA)·EtOH</b>           | 1.62                            | 1.86         | 4.81                            | 98.14        | 1.070                      | 9.175                                       |
| <b>Ni(PTCA)·MeCN</b>           | 1.31                            | 0.90         | 4.73                            | 99.10        | 1.074                      | 9.067                                       |
| <b>Ni(PTCA)·DMF</b>            | 4.18                            | 69.54        | 5.88                            | 30.46        | 1.014                      | 7.379                                       |
| <b>Ni(PTCA)·DMSO</b>           | 2.12                            | 8.44         | 4.82                            | 91.56        | 1.131                      | 7.535                                       |

**Table S4.** The physicochemical property of solvents used in this work<sup>a</sup>

| <b>Solvent</b>                                     | <b>EtOH</b> | <b>MeCN</b> | <b>DMF</b> | <b>MeOH</b> | <b>DMSO</b> | <b>H<sub>2</sub>O</b> |
|----------------------------------------------------|-------------|-------------|------------|-------------|-------------|-----------------------|
| <b>Polarity</b>                                    | 4.3         | 6.2         | 6.6        | 6.6         | 7.2         | 10.2                  |
| <b>Dielectric Constant (<math>\epsilon</math>)</b> | 24.3        | 36.6        | 38.3       | 33          | 47.2        | 80                    |
| <b>Dipole Moment (D)</b>                           | 1.69        | 3.92        | 3.82       | 1.70        | 3.96        | 1.85                  |

<sup>a</sup> John A.Dean. Lange's handbook of chemistry.13thed. BEIJING WORLD PUBLISHING CORPORATION Publishing.1985, 10-98.

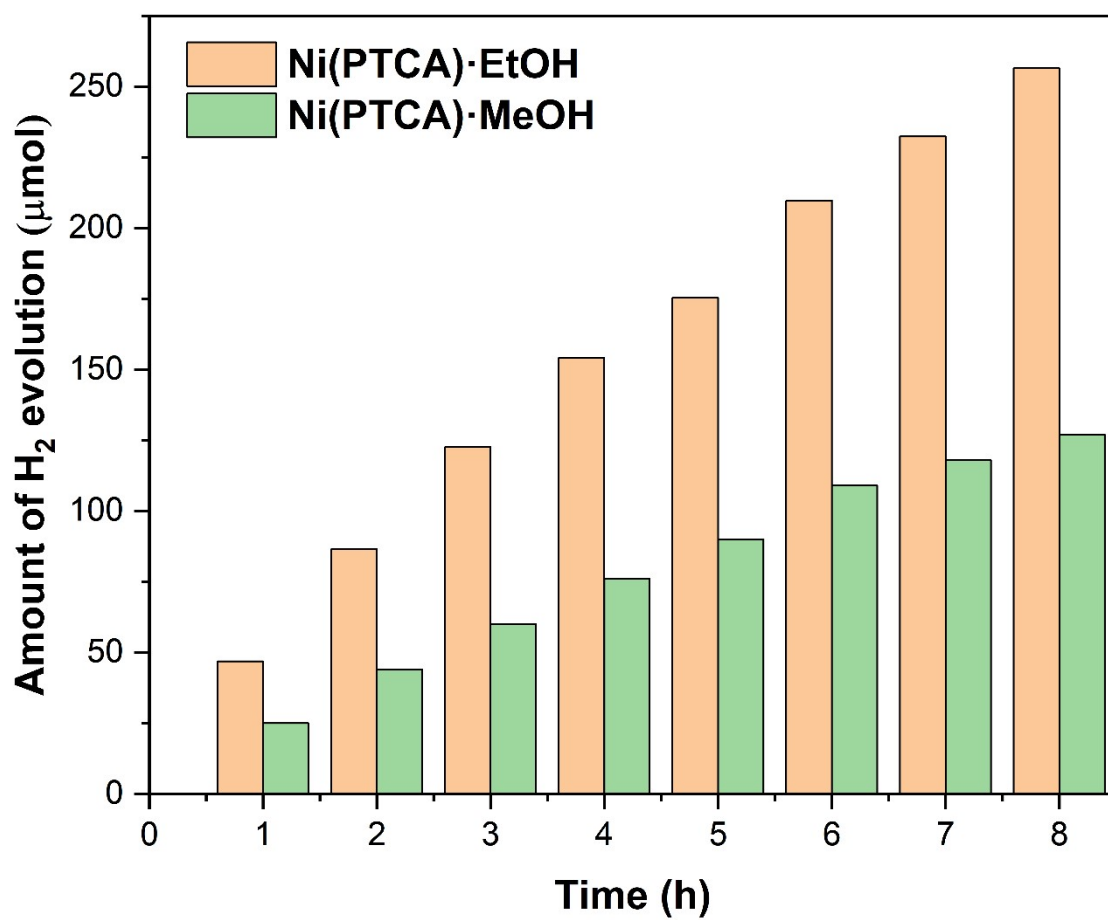

**Fig S9.** Comparison of photocatalytic activities of [Ni(PTCA)·EtOH]-MOF and [Ni(PTCA)·MeOH]-MOF.

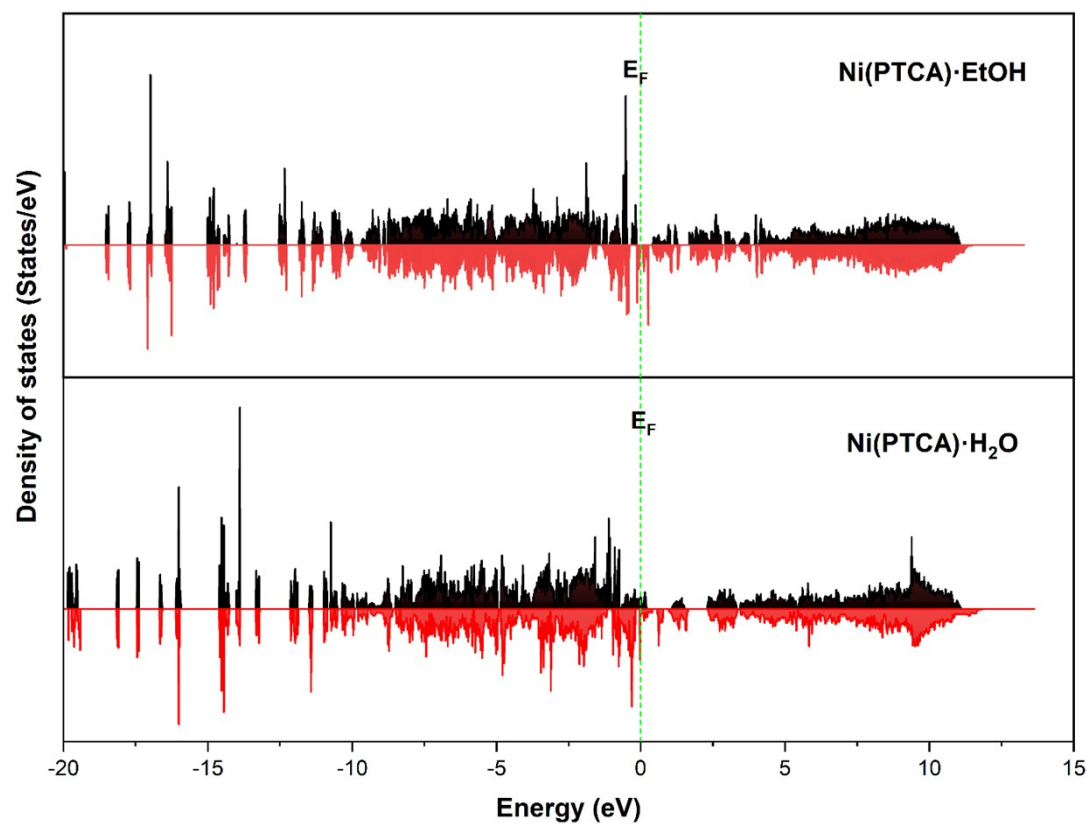

**Fig S10.** TDOS spectrum of  $[\text{Ni(PTCA)·EtOH}]$ -MOF and  $[\text{Ni(PTCA)·H}_2\text{O}]$ -MOF.

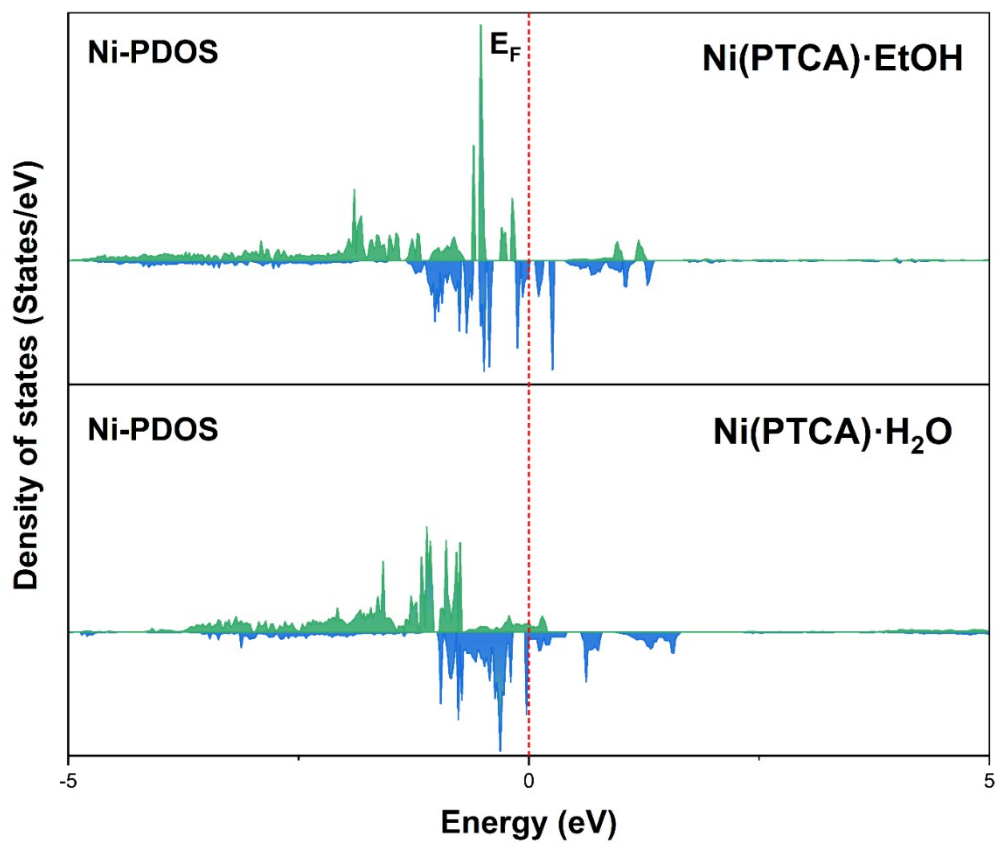

**Fig S11.** Ni-PDOS spectrum of  $[\text{Ni(PTCA)·EtOH}]\text{-MOF}$  and  $[\text{Ni(PTCA)·H}_2\text{O}]\text{-MOF}$ .

### Supplementary Reference

1. Y. Liu, X. Zhao, C. Fang, Z. Ye, Y. B. He, D. Lei, J. Yang, Y. Zhang, Y. Li, Q. Liu, Y. Huang, R. Zeng, L. Kang, J. Liu, Y. H. Huang, *Chem* **2018**, *4*, 2463-2478.
2. X. Hao, Y. Hu, Z. Cui, J. Zhou, Y. Wang, Z. Zou, *Appl Catal B-Environ* **2019**, *244*, 694-703.
3. V. Wang, N. Xu, J. C. Liu, G. Tang, W. T. Geng, *Comput Phys Commun* **2021**, *267*, 108033.
4. D. Gao, X. Wu, P. Wang, H. Yu, B. Zhu, J. Fan, J. Yu, *Chem Eng J* **2021**, *408*, 127230.
